# Supplementary material for: Synthesis of rigid cores based on 1,1′-biadamantane
Source: Royal Society of Chemistry journal article supplement (doi:10.1039/c5ra27528h), 2016-01-01
Supplement: c5ra27528h1.pdf [file c5ra27528h1.pdf]

## Supporting Information

### Synthesis of Rigid Cores Based on 1,1'-Biadamantane

Xiangfeng Lai, Jianwei Guo\*, Shuqin Fu, Dongyu Zhu

Faculty of Chemical Engineering & Light Industry, Guangdong University of Technology, Guangzhou

510006, China. E-mail: [guojw@gdut.edu.cn](mailto:guojw@gdut.edu.cn); Tel./Fax: +86 (020) 39322232

## Table of Contents

|              |                                                        |            |
|--------------|--------------------------------------------------------|------------|
| <b>I.</b>    | <b>Experimental.....</b>                               | <b>S3</b>  |
| <b>II.</b>   | <b><sup>1</sup>H NMR spectrum of compound 2c.....</b>  | <b>S4</b>  |
| <b>III.</b>  | <b><sup>13</sup>C NMR spectrum of compound 2c.....</b> | <b>S5</b>  |
| <b>IV.</b>   | <b>HSQC NMR spectrum of compound 2c.....</b>           | <b>S6</b>  |
| <b>V.</b>    | <b><sup>1</sup>H NMR spectrum of compound 4a.....</b>  | <b>S7</b>  |
| <b>VI.</b>   | <b><sup>13</sup>C NMR spectrum of compound 4a.....</b> | <b>S8</b>  |
| <b>VII.</b>  | <b><sup>1</sup>H NMR spectrum of compound 4b.....</b>  | <b>S9</b>  |
| <b>VIII.</b> | <b><sup>13</sup>C NMR spectrum of compound 4b.....</b> | <b>S10</b> |
| <b>IX.</b>   | <b><sup>1</sup>H NMR spectrum of compound 4c.....</b>  | <b>S11</b> |
| <b>X.</b>    | <b><sup>13</sup>C NMR spectrum of compound 4c.....</b> | <b>S12</b> |
| <b>XI.</b>   | <b>HSQC NMR spectrum of compound 4c.....</b>           | <b>S13</b> |

## Experimental Section

**3, 3', 5, 5', 7, 7'-Hexabromo-1, 1'-biadamantane (2c).** 1,1'-Biadamantane (2.70g, 9.98mmol) was added portionwise over 30 min to a stirred mixture of Br<sub>2</sub> (50mL) and anhydrous AlCl<sub>3</sub> (2.66g, 19.96mmol) at 0°C, and then heated to 85°C over a period of 1h and kept at that temperature for 48h. Hydrogen bromide was evolved copiously during the addition and heating. The cooled mixture was treated subsequently with saturated aqueous NaHSO<sub>3</sub> solution and hydrochloric acid. The solids were removed by filtration, washed and air-dried. The crude product was extracted with CHCl<sub>3</sub> for 24h and then recrystallized from N-Methyl-2-pyrrolidinone (NMP), giving 5.20g (70%) of **2d** as white solid. <sup>1</sup>H NMR (400 MHz, Pyridine-d<sub>5</sub>) δ 2.83 (s, 12H), 2.26 (s, 12H); <sup>13</sup>C NMR (101 MHz, Pyridine-d<sub>5</sub>) δ 59.44, 55.63, 48.63, 43.49. Anal. Calcd for C<sub>20</sub>H<sub>24</sub>Br<sub>6</sub>: C, 32.29; H, 3.25. Found: C, 32.32; H, 3.33.

**General Procedure for the Synthesis of Poly(aryl)-1, 1'-biadamantane (4a-c).** To a 100ml flask were successively added bromobenzene (50mL), anhydrous FeCl<sub>3</sub> (0.01mol) and **2a-2c** (0.01mol). The mixture was magnetically stirred at room temperature for 30min and then heated to reflux until hydrogen bromide ceased to release. The reaction mixture was cooled to room temperature and then poured into a mixture of 50mL of 0.1M HCl aqueous solution and 100mL of CH<sub>2</sub>Cl<sub>2</sub>. The layers were separated, and the aqueous layer was extracted with CH<sub>2</sub>Cl<sub>2</sub> (3×50mL). The combined organic layers were washed successively with saturated NaHCO<sub>3</sub> solution, water and brine. The organic layer was transferred to a separatory chamber and added, as a slow stream, to 1L methanol to precipitate a solid during 1h. After the addition was complete, the methanol suspension was stirred vigorously for another 1h. The methanol suspension was filtered and dried in the vacuum-oven.

**3, 3'-Bis(4-bromophenyl)-1,1'-biadamantane (4a).** The crude product was purified by silica gel chromatography eluted with petroleum ether. The first fraction was concentrated and recrystallized from DMF to afford **4a** as white crystals with the yield of 3.31 g (57%). <sup>1</sup>H NMR (400 MHz, CDCl<sub>3</sub>) δ 7.48-7.36 (m, 4H), 7.28-7.17 (m, 4H), 2.23-2.12 (m, 4H), 1.87-1.51 (m, 24H); <sup>13</sup>C NMR (101 MHz, CDCl<sub>3</sub>) δ 150.34, 131.12, 126.86, 119.36, 42.46, 41.70, 37.66, 36.88, 36.39, 34.48, 29.33. Anal. Calcd for C<sub>32</sub>H<sub>36</sub>Br<sub>2</sub>: C, 66.22; H, 6.25. Found: C, 66.13; H, 6.20.

**3, 3', 5, 5'-Tetrakis(4-bromophenyl)-1,1'-biadamantane (4b).** The crude product was purified by silica gel chromatography eluted with CH<sub>2</sub>Cl<sub>2</sub>: hexane= 1:50. The fraction with an R<sub>f</sub> value of 0.68 was concentrated and recrystallized from DMF to afford **4b** as white crystals with the yield of 4.72 g (53%). <sup>1</sup>H NMR (400 MHz, CDCl<sub>3</sub>) δ 7.50-7.13 (m, 16H), 2.27-1.70 (m, 24H), 1.58-1.52 (m, 2H); <sup>13</sup>C NMR (101 MHz, CDCl<sub>3</sub>) δ 150.34, 131.12, 126.87, 119.36, 42.46, 41.70, 37.66, 36.88, 36.39, 34.47, 29.32. Anal. Calcd for C<sub>44</sub>H<sub>42</sub>Br<sub>4</sub>: C, 59.35; H, 4.75. Found: C, 59.24; H, 4.70.

**3, 3', 5, 5', 7, 7'-Hexakis(4-bromophenyl)-1,1'-biadamantane (4c).** The crude product was recrystallized from DMF to give 2.64g (44%) of **3d** as a white solid. <sup>1</sup>H NMR (400 MHz, CDCl<sub>3</sub>) δ 7.46 (dt, J=9.21, 2.03 Hz, 12H), 7.26 (dt, J=9.21, 2.03 Hz, 12H), 2.06 (d, J=11.97 Hz, 6H), 1.93 (d, J=11.97 Hz, 6H), 1.80(s, 12H); <sup>13</sup>C NMR (101 MHz, CDCl<sub>3</sub>) δ 148.16, 131.52, 126.84, 120.23, 46.65, 40.41, 38.92, 38.58. Anal. Calcd for C<sub>56</sub>H<sub>48</sub>Br<sub>6</sub>: C, 56.03; H, 4.03. Found: C, 56.14; H, 4.12.

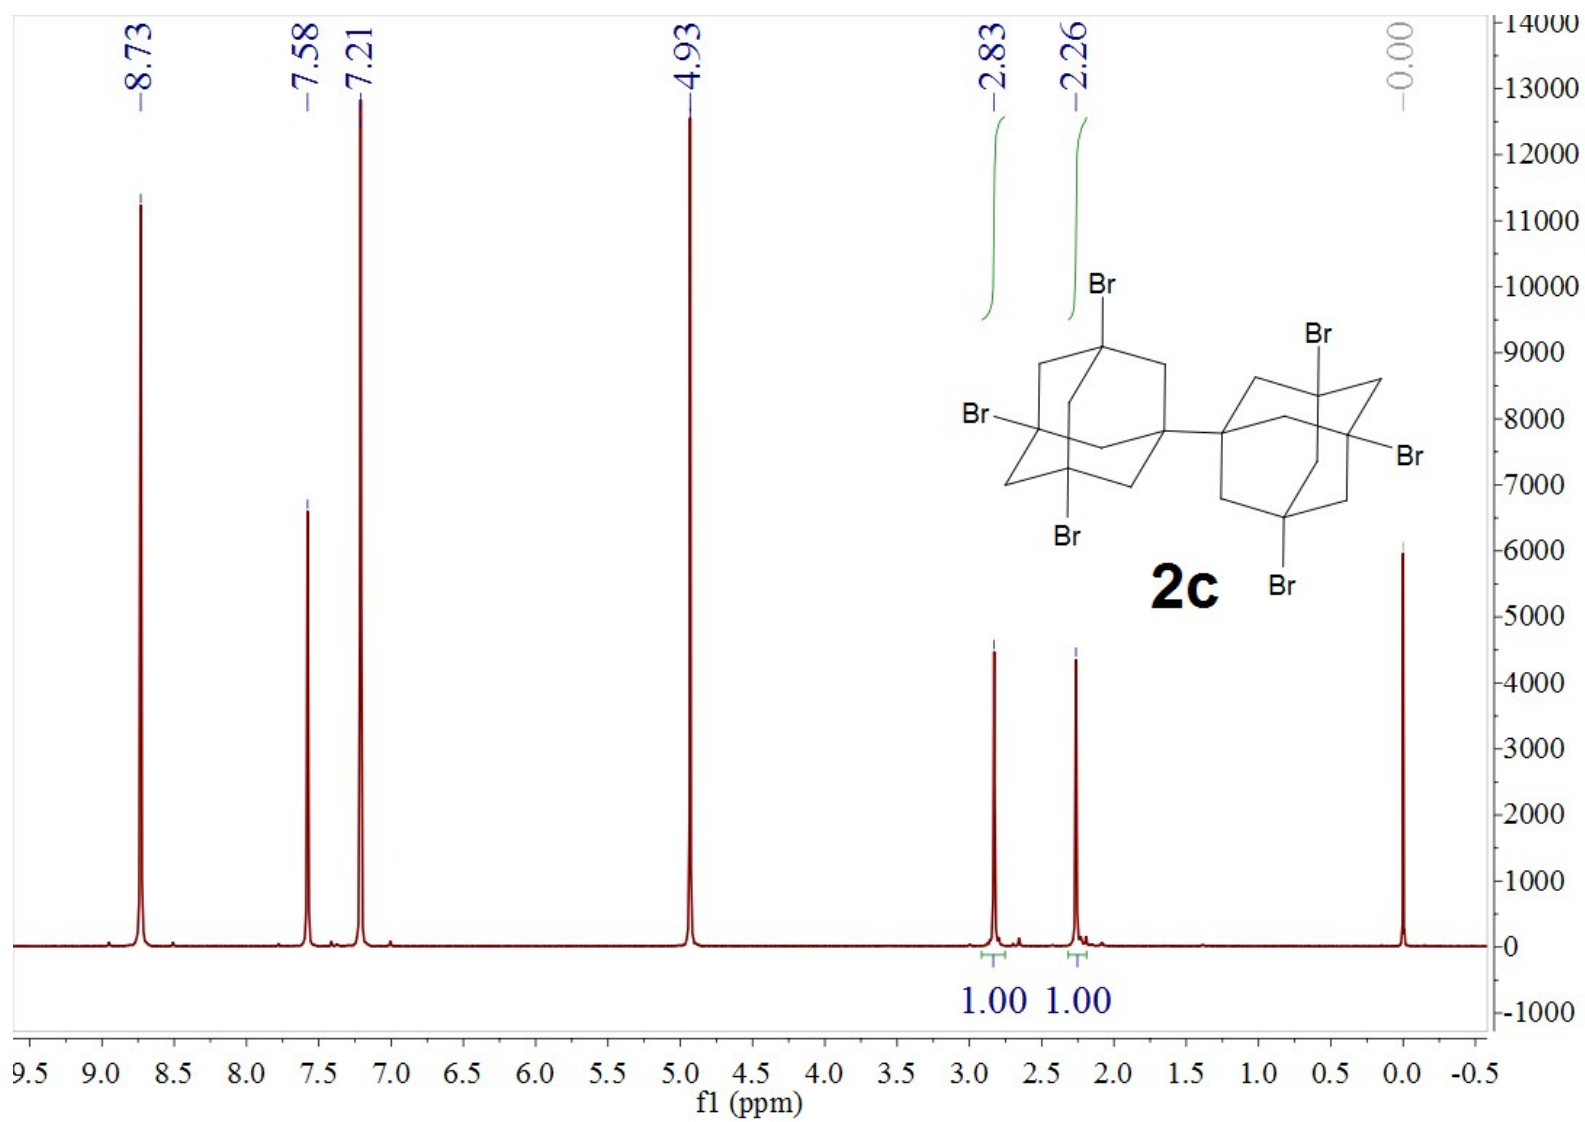

S4

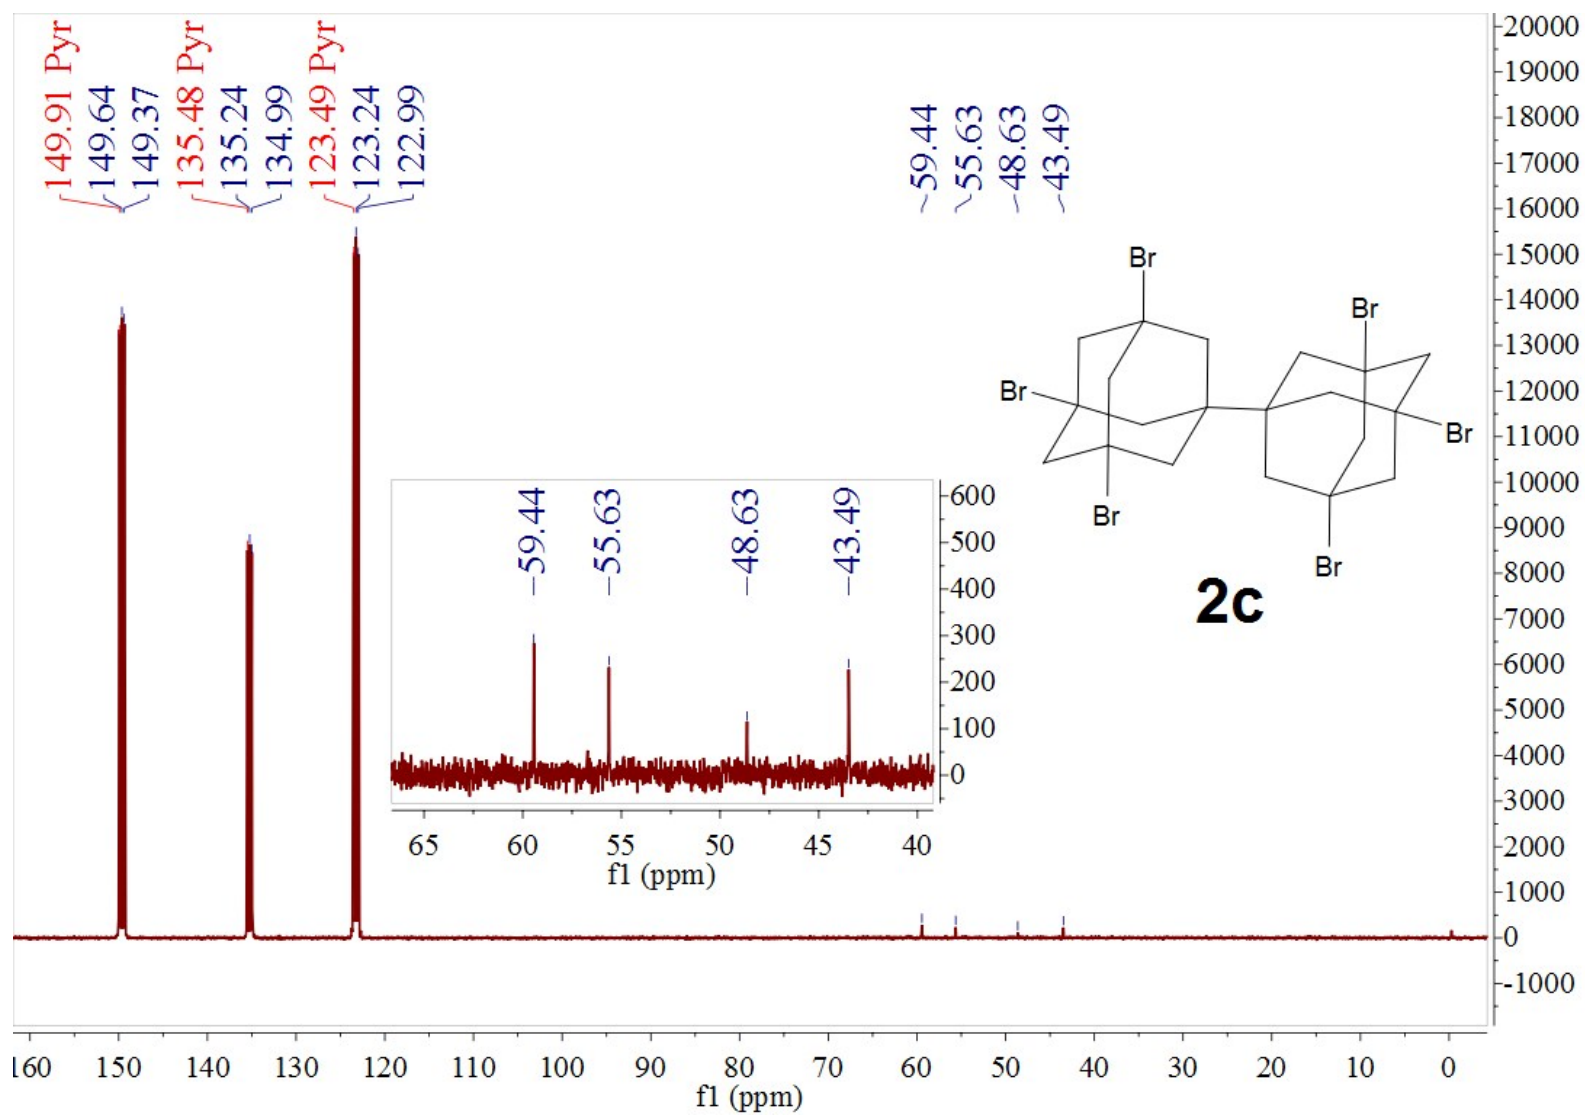

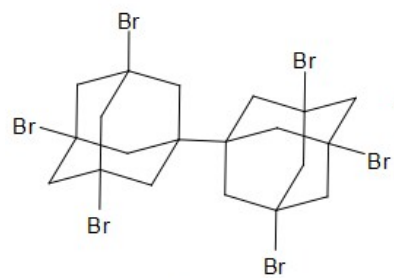

**2c**

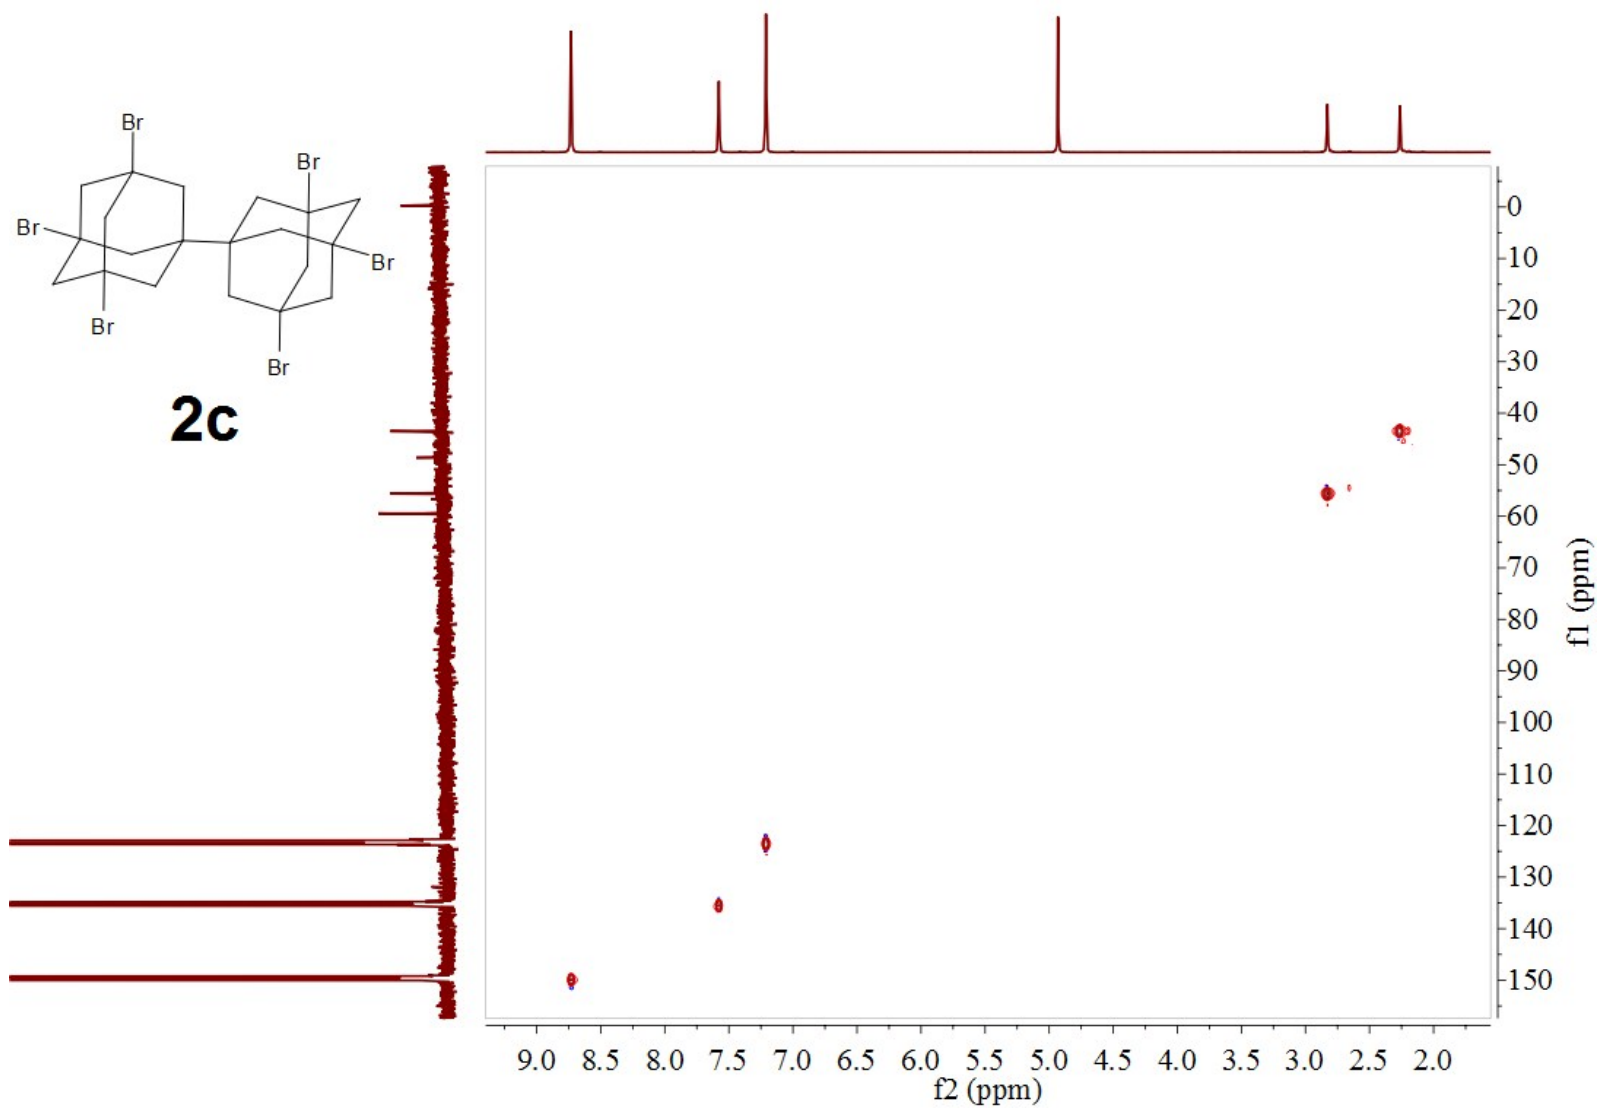

**S6**

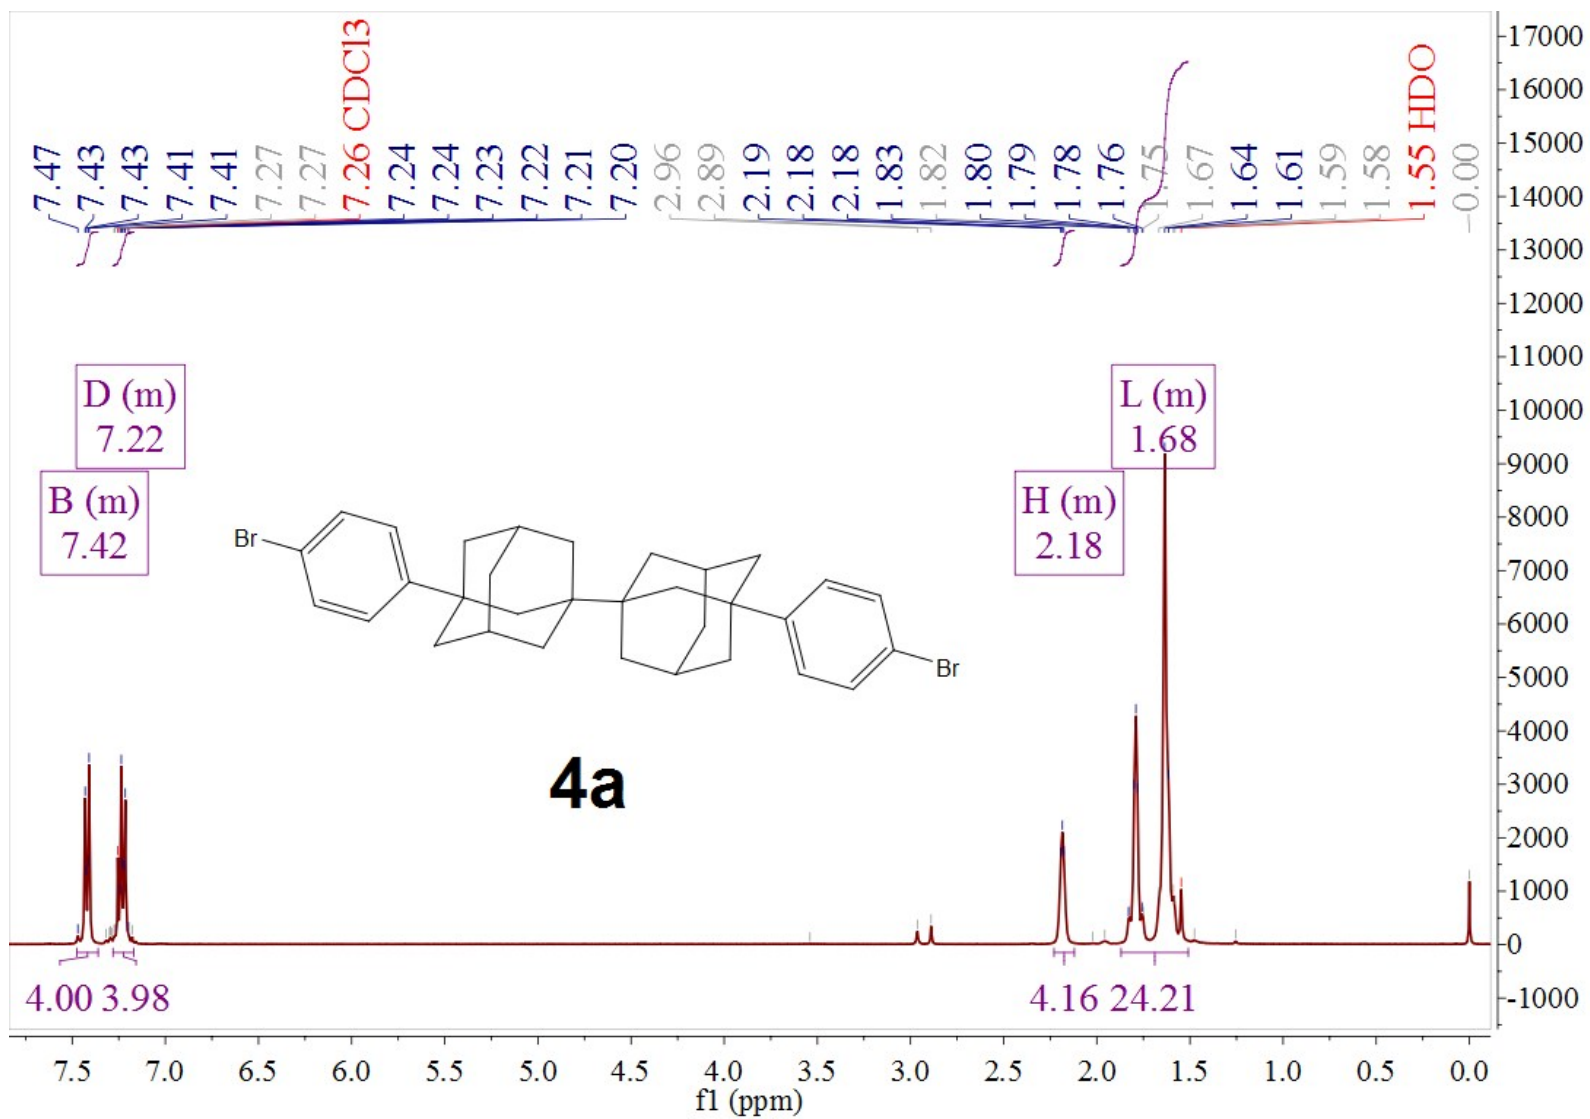

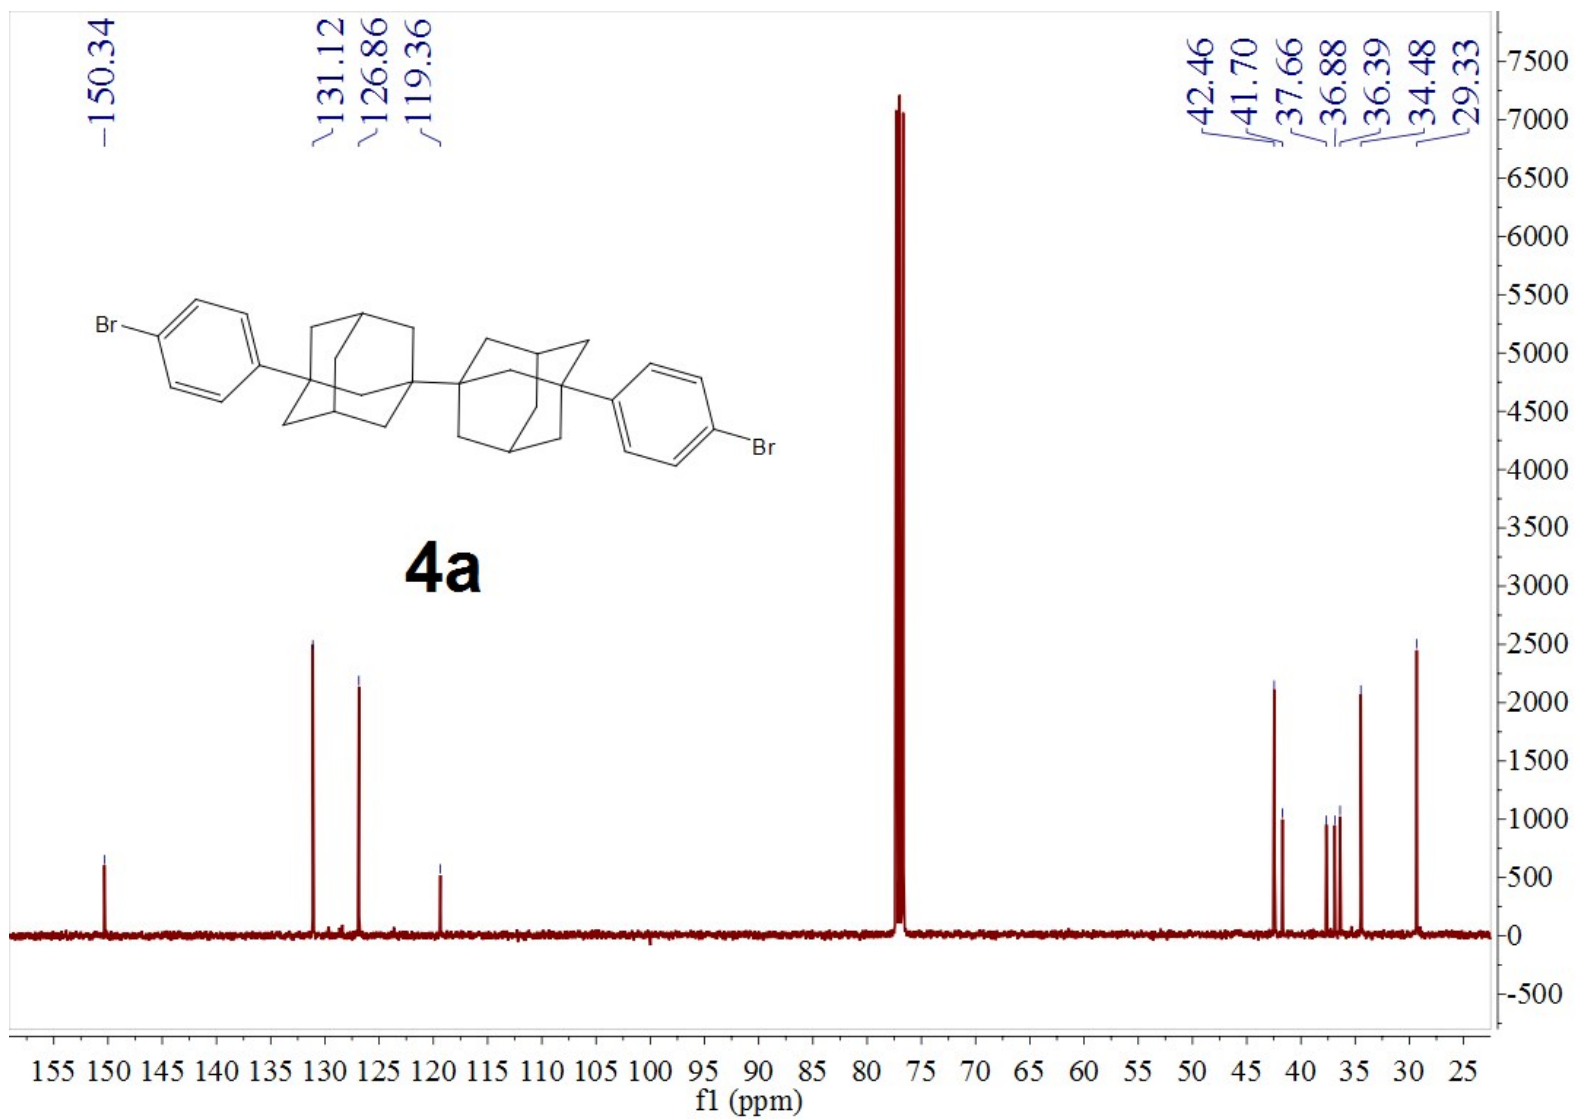



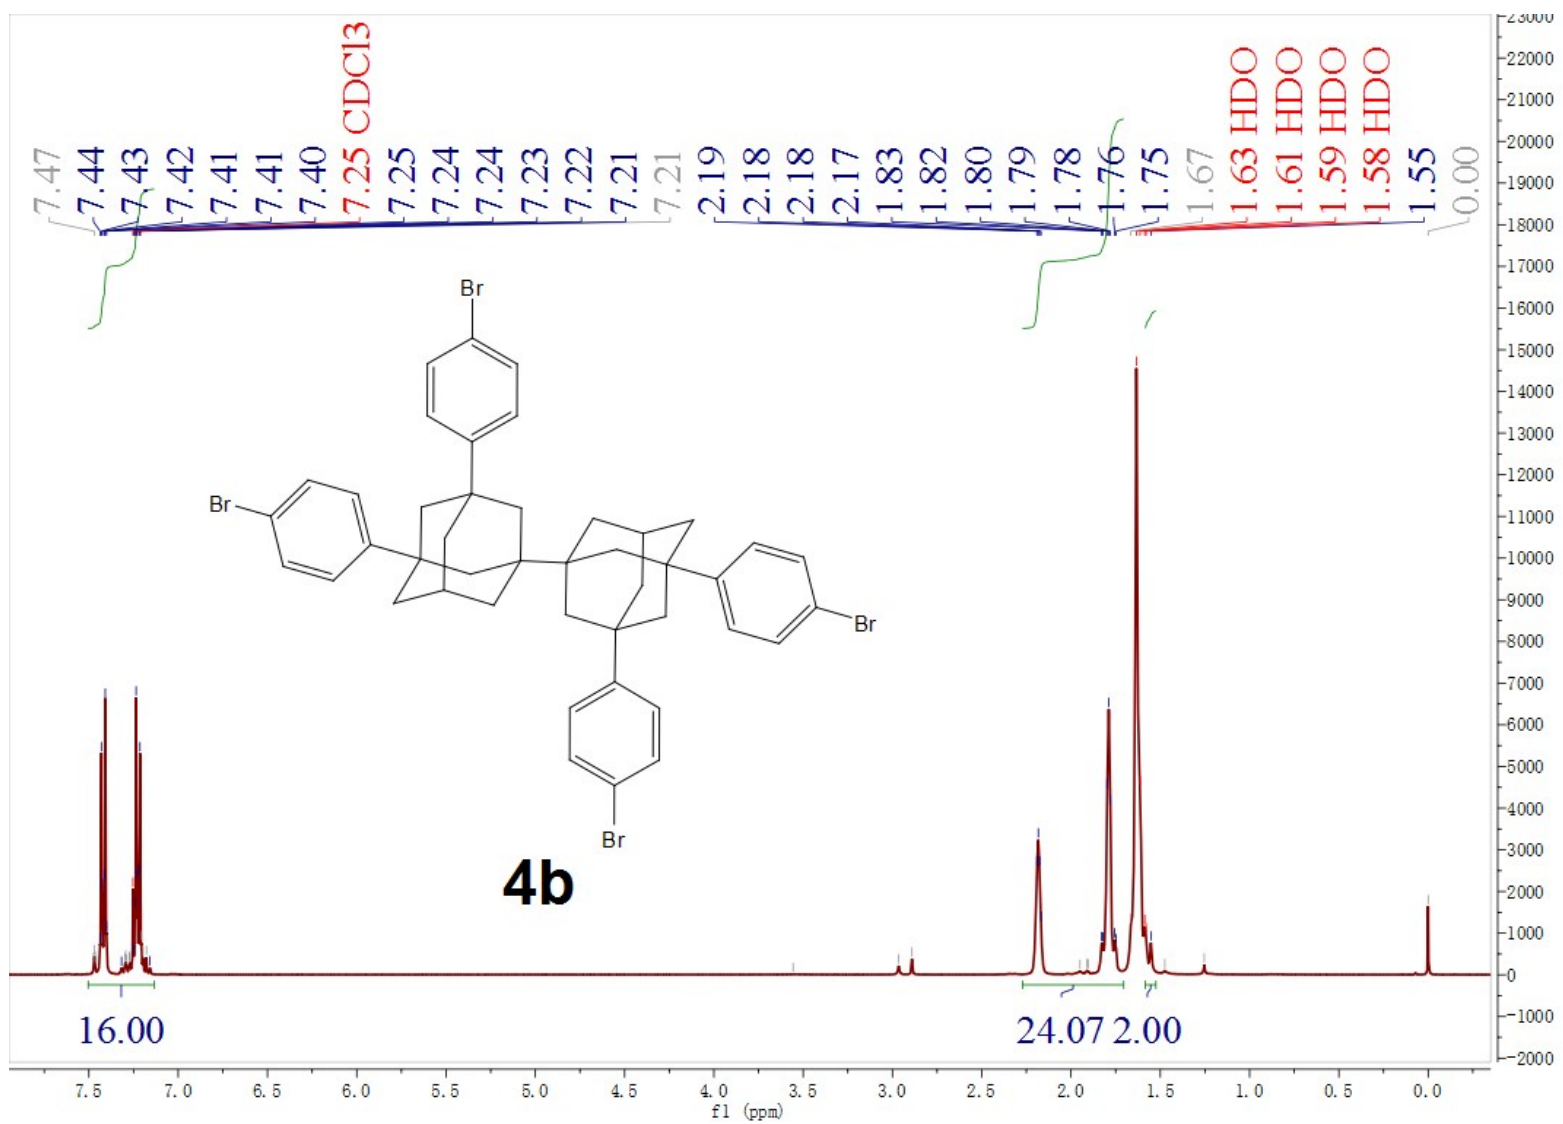

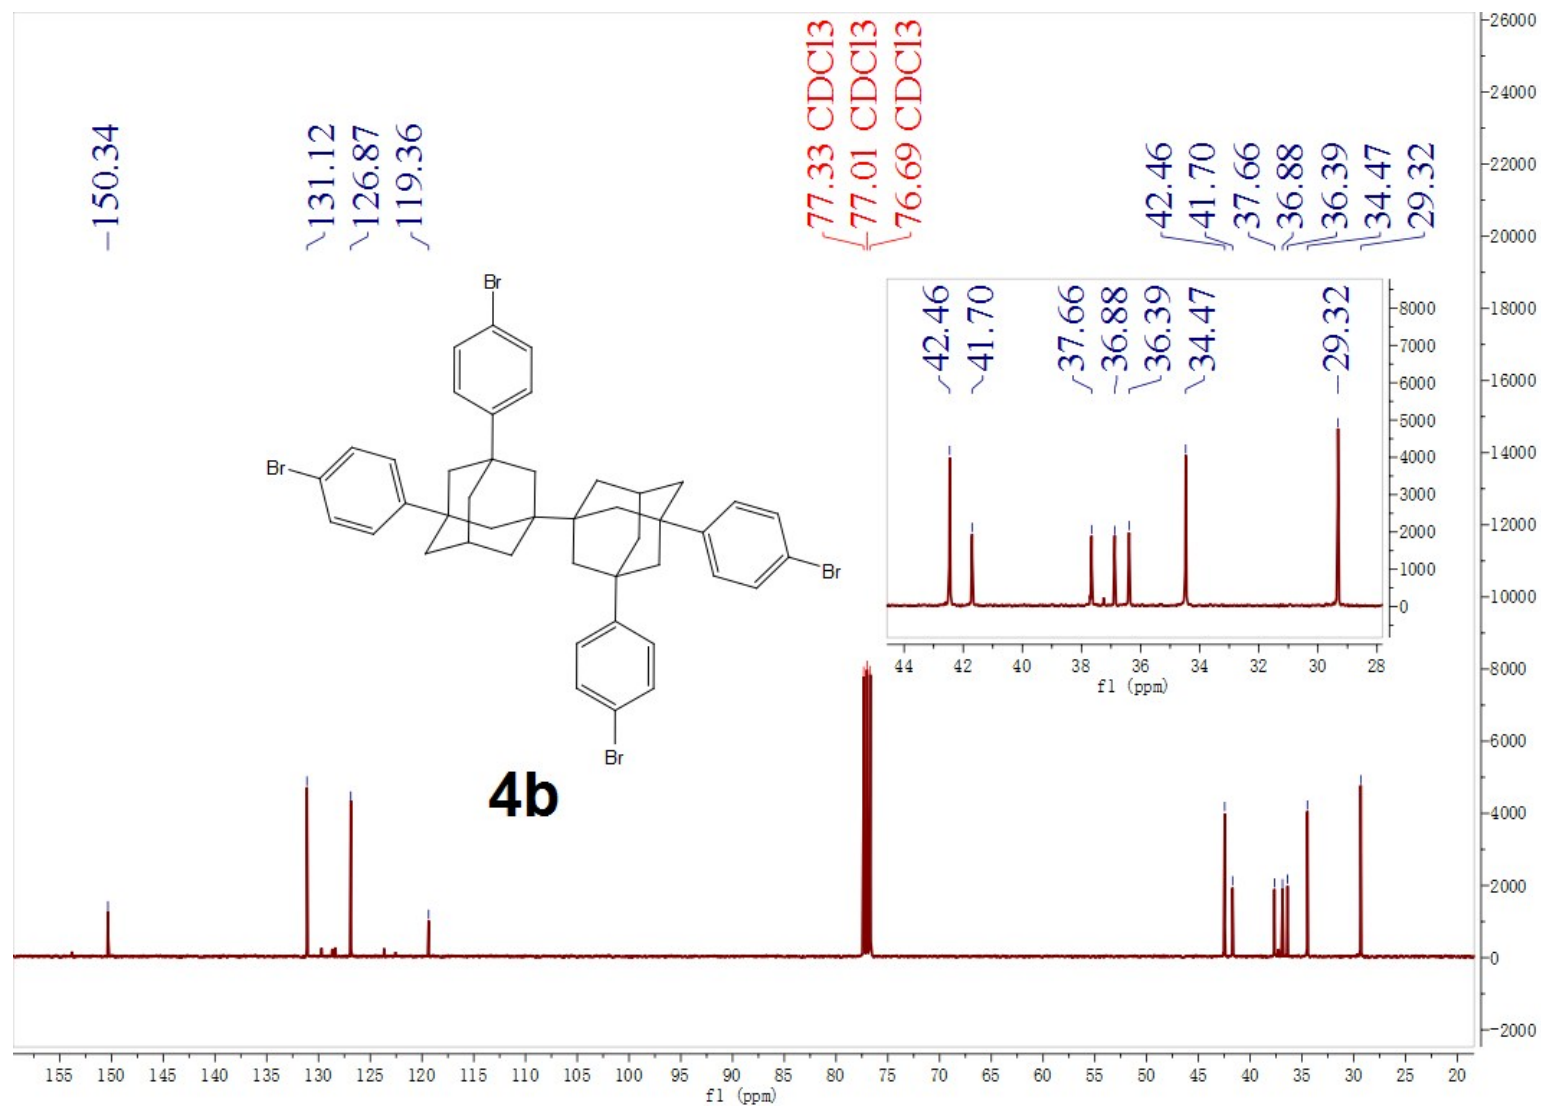

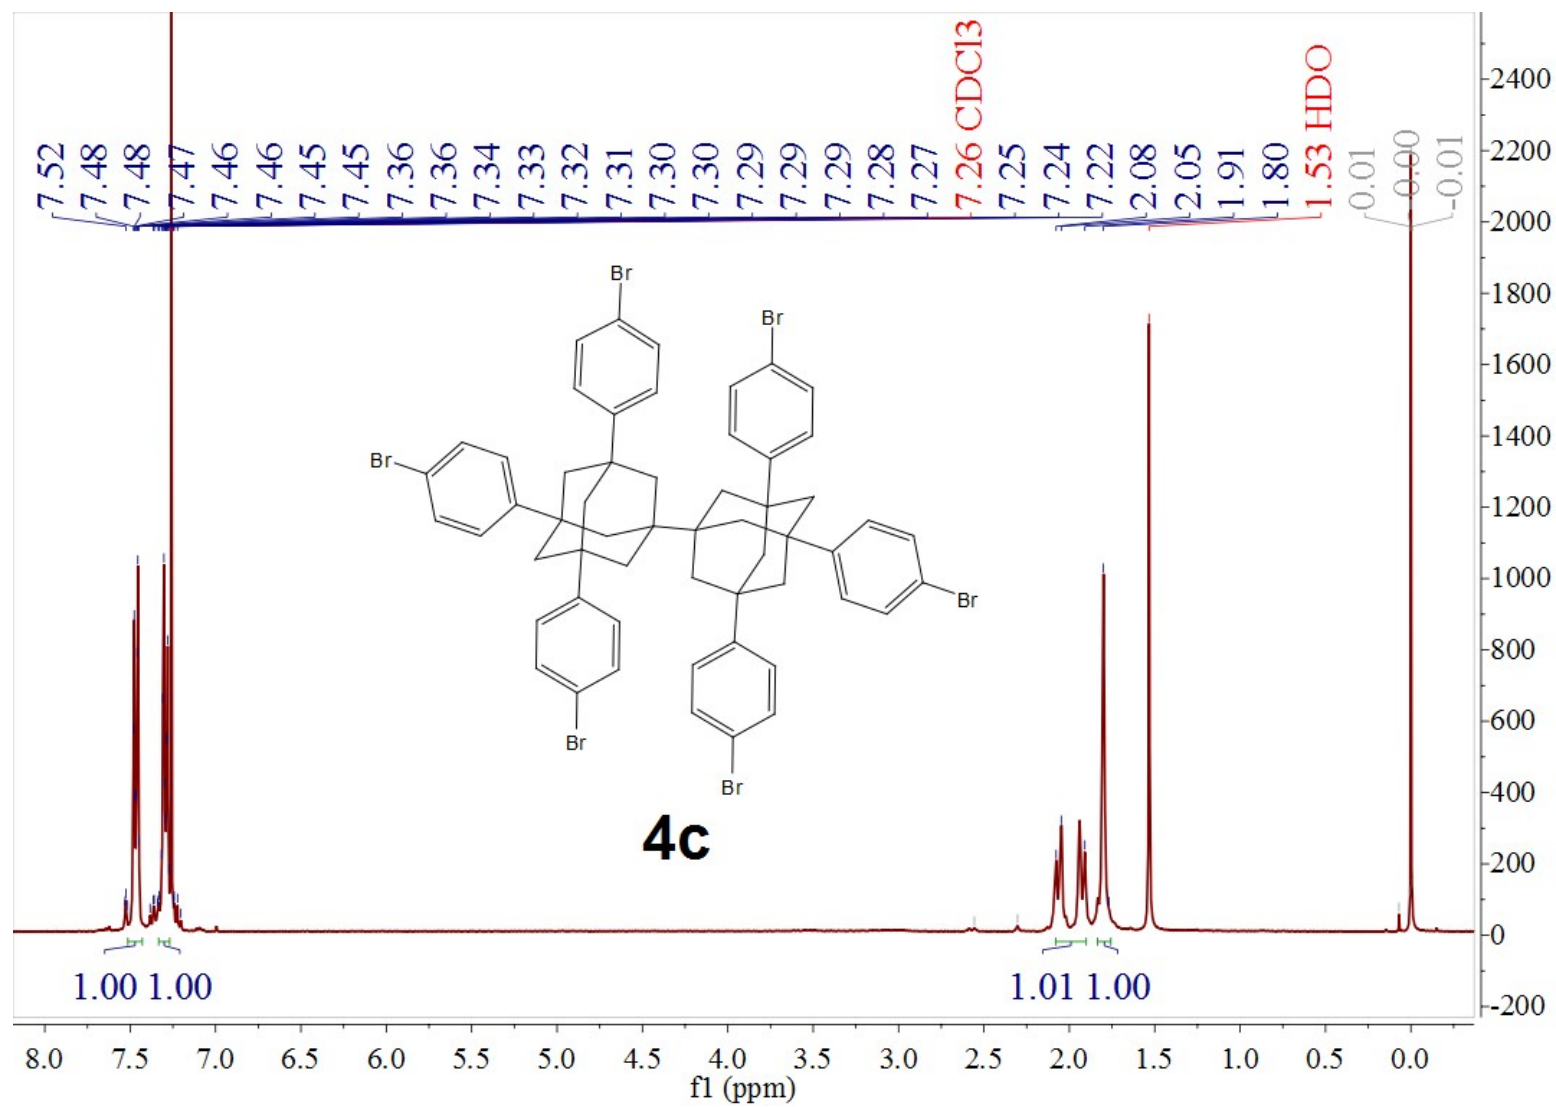

S11

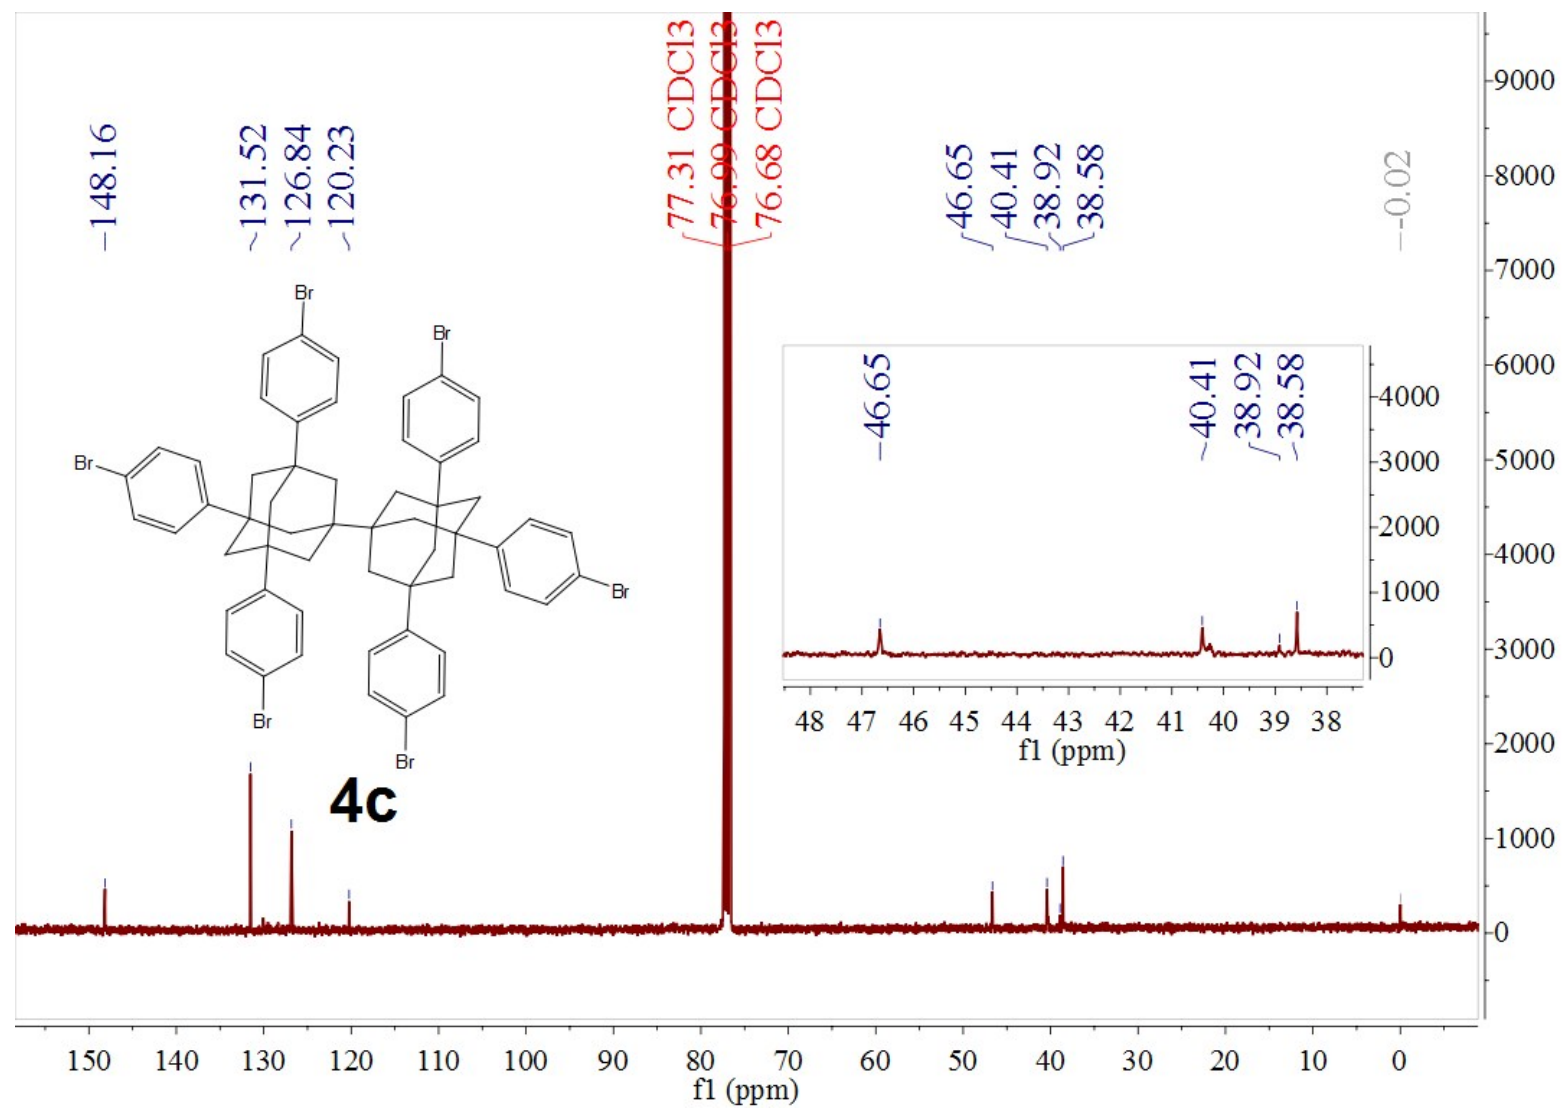

S12

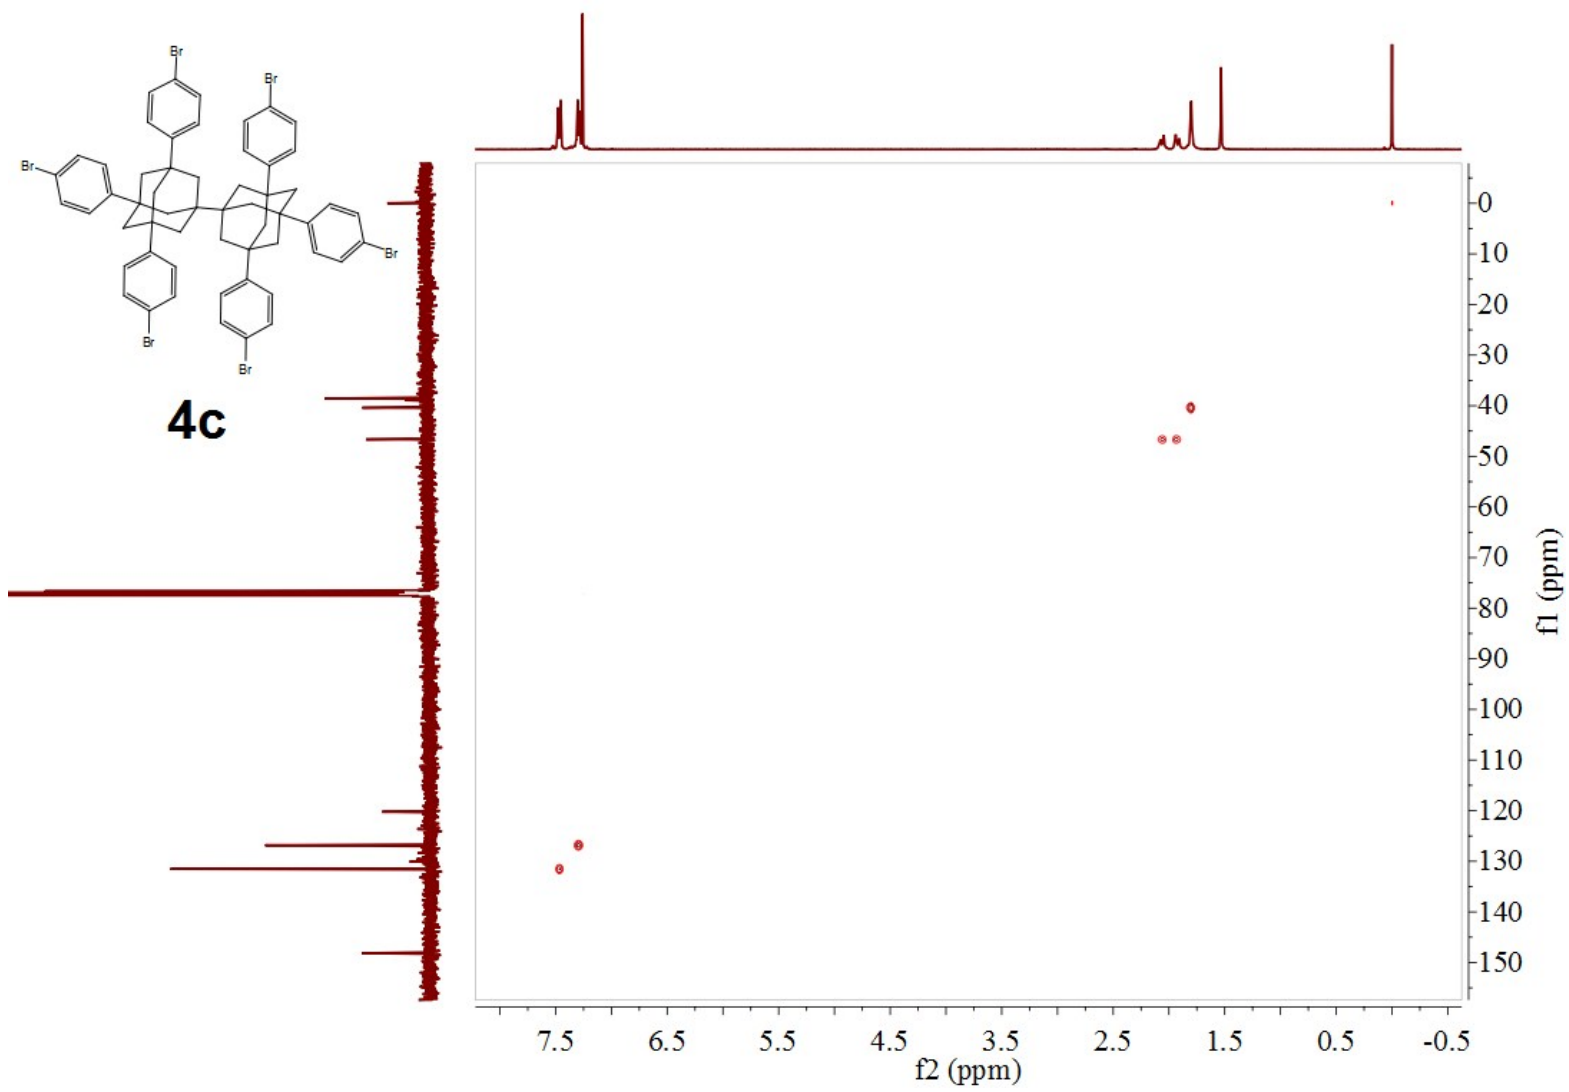

S13
